# Supplementary material for: The Disruption of the β-Catenin/TCF-1/STAT3 Signaling Axis by 4-Acetylantroquinonol B Inhibits the Tumorigenesis and Cancer Stem-Cell-Like Properties of Glioblastoma Cells, In Vitro and In Vivo
Source: MDPI journal article supplement (doi:10.3390/cancers10120491), 2018-12-05
Supplement: s1 [file s1]

# Supplementary Materials: The Disruption of the $\beta$ -catenin/TCF-1/Stat3 Signaling Axis by 4-Acetylanthroquinonol B Inhibits the Tumorigenesis and Cancer Stem Cell-Like Properties of Glioblastoma Cells, In Vitro and In Vivo

Heng-Wei Liu, Yu-Kai Su, Oluwaseun Adebayo Bamodu, Dueng-Yuan Hueng, Wei-Hwa Lee, Chun-Chih Huang, Li Deng, Michael Hsiao, Ming-Hsien Chien, Chi-Tai Yeh, Chien-Min Lin

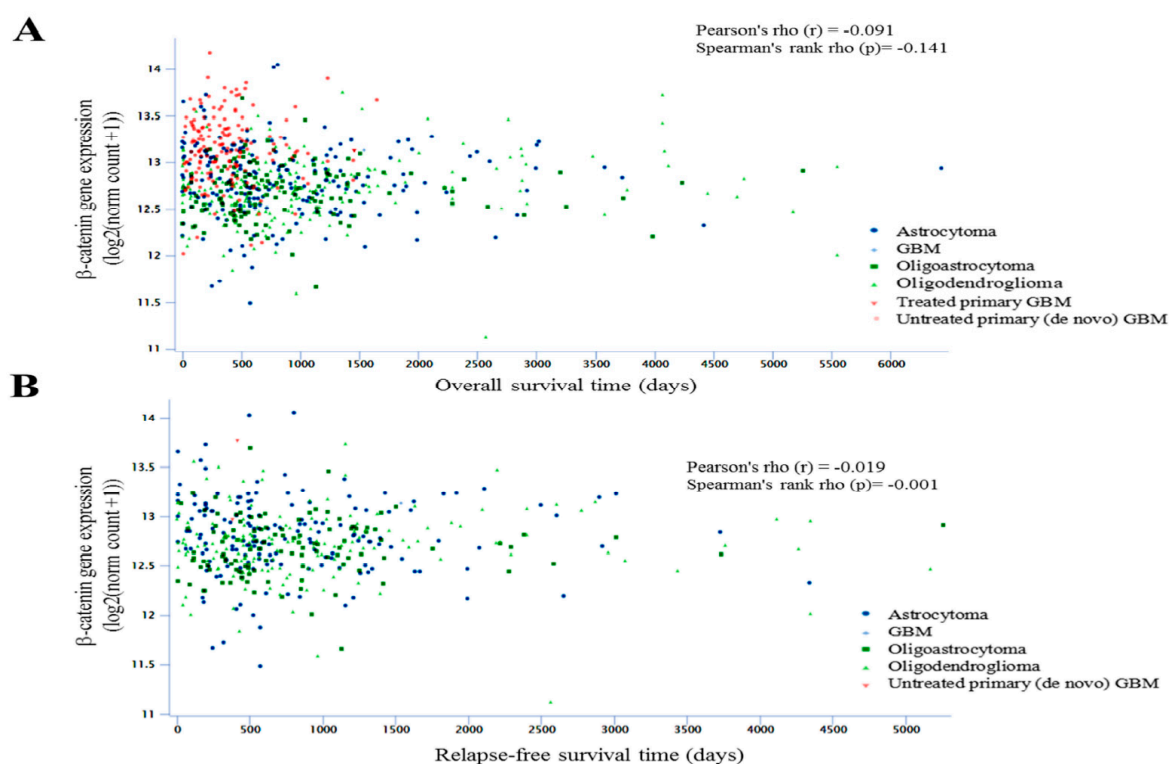

**Figure S1.** Aberrant expression of  $\beta$ -catenin is characteristic of GBM and correlates with poor prognosis. Analyses of the TCGA lower grade glioma and glioblastoma cohort (GBMLGG,  $n = 1152$ ) according to their histological type show that **(A)**  $\beta$ -catenin is notably more expressed and correlates more with worse overall survival in untreated primary GBM, GBM, and treated primary GBM, compared to astrocytoma, oligoastrocytoma and oligodendroglioma. **(B)**  $\beta$ -catenin is notably more expressed and correlates more with worse relapse-free survival in untreated primary GBM, and GBM, compared to astrocytoma, oligoastrocytoma and oligodendroglioma.

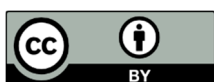

© 2018 by the authors. Licensee MDPI, Basel, Switzerland. This article is an open access article distributed under the terms and conditions of the Creative Commons Attribution (CC BY) license (<http://creativecommons.org/licenses/by/4.0/>).
